# Supplementary material for: Complete genome sequence of the Robinia pseudoacacia L. symbiont Mesorhizobium amorphae CCNWGS0123
Source: Stand Genomic Sci. 2018 Sep 18;13:18. doi: 10.1186/s40793-018-0321-3 (PMC6145117; doi:10.1186/s40793-018-0321-3)
Supplement: Supplementary file 6 — Table S6. Genes involved in heavy metal resistant and homeostasis throughout the whole genome. (XLSX 13 kb) [file 40793_2018_321_MOESM6_ESM.xlsx]

## Sheet: Sheet1
Table S6 Similarities of proteins involved in heavy metal resistant and homeostasis
Protein	Metal	Function	M. amorphae CCNWGS0123	M. huakuii 7653R	M. loti MAFF303099	M.ciceri WSM1271	M. opportunistum WSM2075
GtrA	-	Bactoprenol-linked glucose translocase (Flippase)	Mea0123GM001031	-	-	Mesci_6140 (45%)	-
			Mea0123GM001860	MCHK_0194 (92%)	mlr6508 (92%)	Mesci_2400 (92%)	Mesop_2536 (93%)
				MCHK_8419 (80%)
ArsC	As	Arsenate reductase (glutaredoxin family)	Mea0123GM000433	-	mlr3966 (81%)	-	-
			Mea0123GM001816	MCHK_0142 (85%)	mll6454 (85%)	Mesci_2366 (88%)	Mesop_2510 (87%)
			Mea0123GM002348	MCHK_089 (82%)	mlr7393 (82%)	Mesci_5105 (82%)	Mesop_5691 (92%)
			Mea0123GM002758	MCHK_3665 (81%)	mll2168 (83%)	-	Mesop_0777 (87%)
			Mea0123GM002759	MCHK_3664 (87%)	mll2167 (89%)	Mesci_2734 (84%)	Mesop_0776 (69%)
ArsR	As	Arsenical resistance operon repressor	Mea0123GM000299	MCHK_5122 (93%)	msr3770 (94%)	Mesci_1379(89%)	Mesop_1401 (93%)
			Mea0123GM000317	MCHK_5149 (86%)	mll3795 (86%)	-	Mesop_1382 (86%)
			Mea0123GM000418	MCHK_5264 (91%)	mll3947 (92%)	Mesci_1256 (92%)	Mesop_1287 (93%)
			Mea0123GM000656	MCHK_5501 (87%)	mll4280 (80%)	Mesci_1004 (74%)	Mesop_1044 (78%)
			Mea0123GM000911	MCHK_5745 (91%)	mlr4605 (90%)	Mesci_0784 (90%)	Mesop_0816 (91%)
			Mea0123GM001313	MCHK_4981 (93%)	mll3600 (92%)	Mesci_1486 (94%)	Mesop_1529 (91%)
			Mea0123GM002347	MCHK_5125 (71%)	mll3559 (54%)	-	-
				MCHK_4947 (54%)	mll3772 (49%)
			Mea0123GM002692	MCHK_1244 (84%)	mlr7816 (86%)	Mesci_4784 (81%)	Mesop_5277 (84%)
			Mea0123GM002756	MCHK_3666 (83%)	mll2170 (82%)	Mesci_2732 (74%)	-
			Mea0123GM002760	MCHK_3663 (91%)	mll2166 (92%)	Mesci_2735 (73%)	-
			Mea0123GM003151	-	mlr2159 (77%)	-	-
			Mea0123GM003786	MCHK_2437 (90%)	mlr0745 (90%)	Mesci_4059 (93%)	Mesop_4180 (88%)
			Mea0123GM004489	MCHK_3752 (90%)	mll2255 (89%)	Mesci_3383 (85%)	Mesop_3085 (89%)
			Mea0123GM004772	MCHK_3207 (91%)	mll1589 (91%)	Mesci_3126 (92%)	Mesop_3511 (92%)
			Mea0123GM005361	MCHK_4126 (92%)	mlr2511 (92%)	Mesci_2279 (91%)	Mesop_2417 (89%)
			Mea0123GM005397	MCHK_4158 (93%)	mlr2554 (92%)	Mesci_2242 (92%)	Mesop_2382 (92%)
			Mea0123GM001797	-	-	-	-
			Mea0123GM002757	-	-	-	-
			Mea0123GM004652	-	-	-	-
			Mea0123GM006759	-	-	-	-
CzcA	Cd/Zn/Co	Cobalt/zinc/cadmium efflux RND transporter	Mea0123GM001790	-	-	-	-
			Mea0123GM004338	-	-	-	-
			Mea0123GM005897	MCHK_4400 (64%)	-	-	-
ArsR	Cu	Copper resistance protein A	Mea0123GM001765	-	-	-	-
CopF	Cu	Copper P-type ATPase	Mea0123GM001396	MCHK_6367 (85%)	mlr5325 (86%)	Mesci_0186 (87%)	Mesop_0187 (86%)
CopG	Cu	Involved in survival in the presence of high bioavailable Cu(II)	Mea0123GM000037	-	msl3422 (91%)	Mesci_1623 (89%)	Mesop_1670 (91%)
			Mea0123GM003195	-	mlr2150 (74%)	-	-
			Mea0123GM006421	MCHK_2923 (78%)	mlr1300 (78%)	-	-
CopM	Cu	Cytochrome c family protein	Mea0123GM004356	-	mll1048 (82%)	Mesci_4289 (82%)	-
			Mea0123GM005525	MCHK_4320 (81%)	mlr2752 (81%)	Mesci_2115 (83%)	Mesop_2236 (82%)
			Mea0123GM006395	-	-	-	-
			Mea0123GM006849	-	-	-	-
CusB	Cu/Ag	Cu/Ag tricomponent efflux membrane fusion protein	Mea0123GM001789	-	-	-	-
MerA	Hg	Mercuric Hg (II) reductase	Mea0123GM005537	MCHK_4334 (93%)	mlr2769 (93%)	Mesci_2104 (92%)	Mesop_2221 (91%)
	Mo	Mo ABC transporter, periplasmic Mo-binding protein	Mea0123GM004689	MCHK_3106 (88%)	mll1465 (90%)	Mesci_3217 (93%)	Mesop_3608 (89%)
ModB	Mo	Mo ABC transporter, permease protein	Mea0123GM004688	MCHK_3105 (94%)	mll1464 (94%)	Mesci_3218 (95%)	Mesop_3609 (95%)
ModC	Mo	Mo ABC transporter , ATP-binding protein	Mea0123GM004687	MCHK_3104 (85%)	mll1463 (86%)	Mesci_3219 (83%)	Mesop_3610 (86%)
ZitB	Zn	Cation efflux protein (Putative Zinc transporter ZitB)	Mea0123GM005755	MCHK_4506 (90%)	mll2984 (90%)	Mesci_1906 (89%)	Mesop_1957 (89%)
Zur	Zn	Transcriptional repressor of Zn transport system	Mea0123GM006003	MCHK_4740 (96%)	mll3299 (96%)	Mesci_1701 (97%)	Mesop_1752 (96%)
